# Supplementary material
Source: MDPI journal article supplement (https://www.mdpi.com/2073-4395/10/11/1669)
Supplement: s1 [file s1]

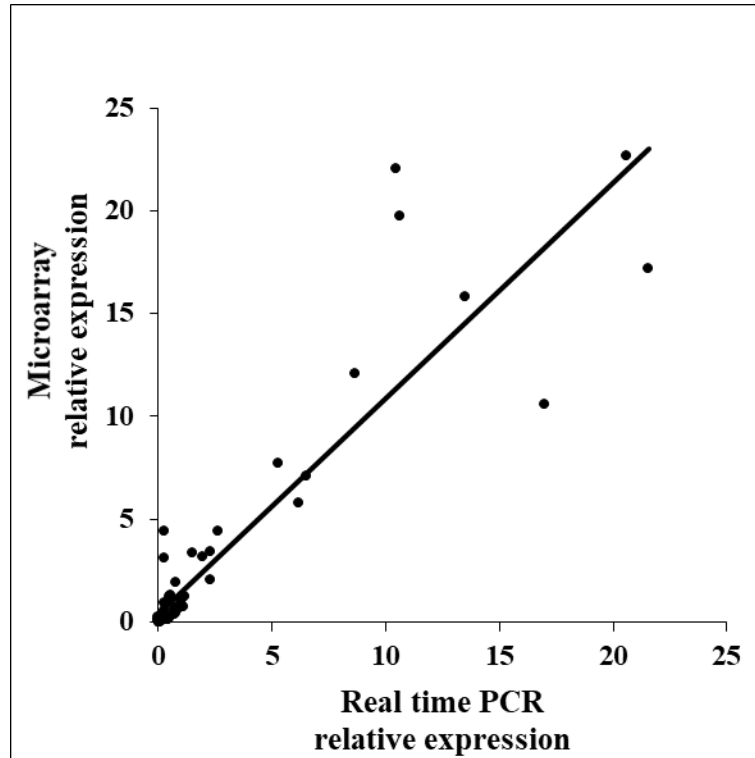

**Supplementary Figure 1.** microarray gene expression validation with real time PCR. Selected transcripts of 1-MCP treated and untreated tomatoes at MG, BR, and EO ripening stages were referred to the untreated MG tomato gene expression that served as reference. The regression equation, correlation coefficient ( $r$ ) and correlation significance ( $p$ ) values between the methods were:  $Y = 1.0494X + 0.3854$ ,  $r = 0.9132$ ,  $p < 0.0001$ , respectively.
